# Supplementary material
Source: PubMed Central journal article supplement (PMC139209)

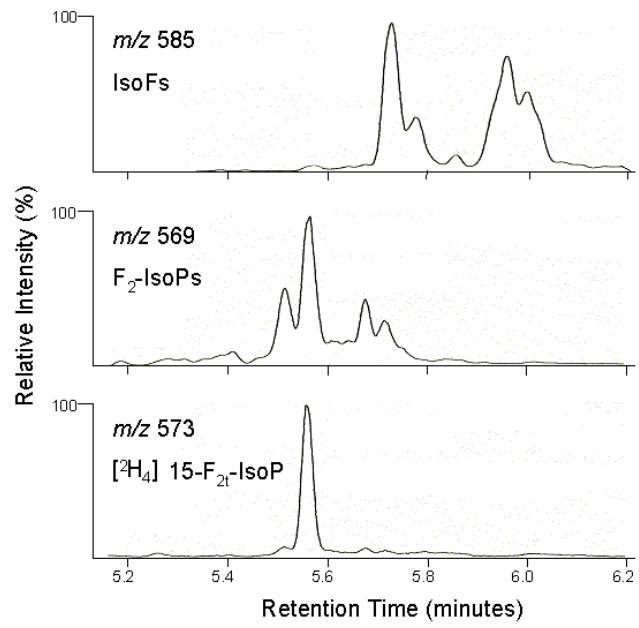

Supplement: pnas_99_26_16713__2.pdf [file pnas_99_26_16713__2.pdf]

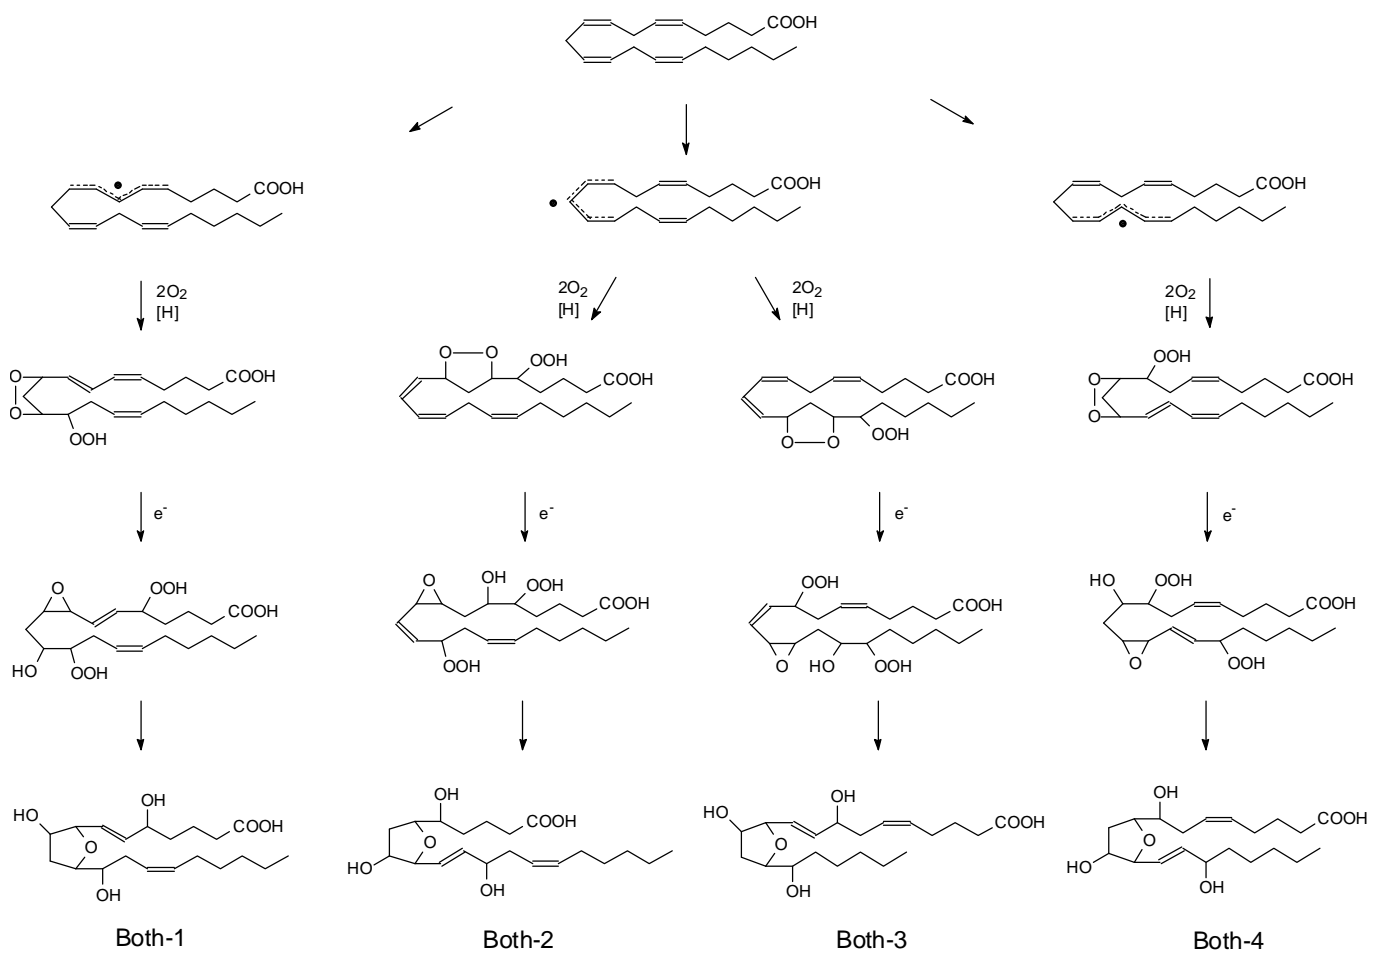

Supplement: pnas_99_26_16713__8.pdf [file pnas_99_26_16713__8.pdf]
